# Supplementary material for: Purine nucleoside phosphorylase enables dual metabolic checkpoints that prevent T cell immunodeficiency and TLR7-associated autoimmunity
Source: PubMed Central journal article supplement (PMC9374381; doi:10.1172/jci160852), 2022-08-15
Supplement: jci-132-160852-s117.pdf [file jci-132-160852-s117.pdf]

# Supplemental Figure 1

Supporting Data for Figure 1

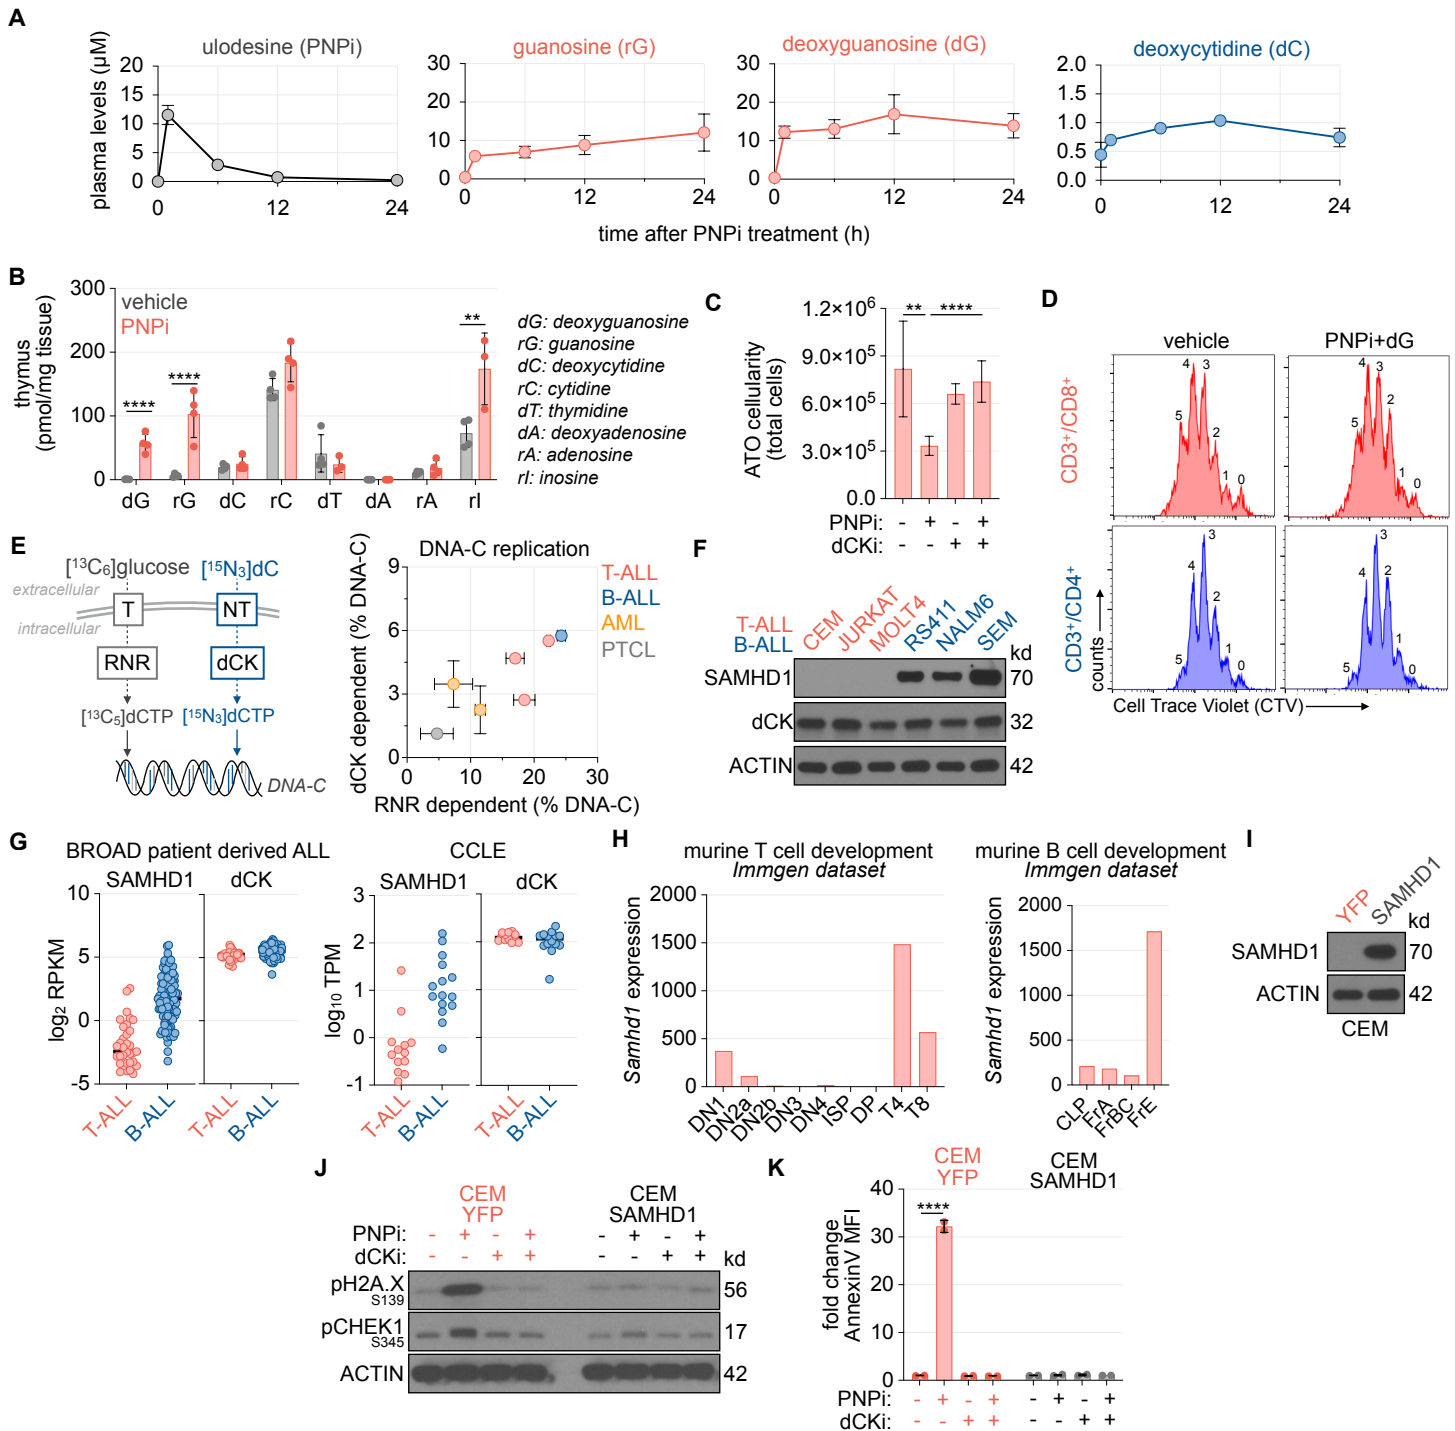

**Figure S1 | Cell-autonomous dCK and SAMHD1 activity determines PNPI lethality. Related to Figure 1. (A)** LC-MS/MS-MRM analysis of NCG mouse serum obtained at indicated timepoints following treatment + 100 mg/kg ulodesine (PNPi; p.o.; n=3). **(B)** LC-MS/MS-MRM analysis of thymus metabolite composition in C57BL/6 mice 24 h after treatment + 100 mg/kg PNPI (p.o.) or vehicle (mean $\pm$ SD; n=4; unpaired t-test). **(C)** Quantification of artificial thymic organoid (ATO) cellularity at week 5 following continuous treatment + 5  $\mu\text{M}$  deoxyguanosine (dG)  $\pm$  1  $\mu\text{M}$  PNPI  $\pm$  1  $\mu\text{M}$  (R)-DI-87 (dCKi; mean $\pm$ SD; n=12; one-way ANOVA corrected for multiple comparisons). **(D)** Flow cytometry analysis of CD3<sup>+</sup>/CD8<sup>+</sup> or CD3<sup>+</sup>/CD4<sup>+</sup>-gated C57BL/6 mouse splenocytes pulsed with Cell Trace Violet (CTV) and stimulated *in vitro* + 5  $\mu\text{M}$  dG  $\pm$  1  $\mu\text{M}$  PNPI for 72 h. Division numbers are indicated. **(E)** LC-MS/MS-MRM analysis of RNR dependent and dC salvage pathway contribution to DNA deoxycytidine (DNA-C) in leukemia cell lines. Cells were cultured with 1 g/L [<sup>13</sup>C<sub>6</sub>]glucose (to track RNR dependent *de novo* nucleotide synthesis) and 5  $\mu\text{M}$  [<sup>15</sup>N<sub>3</sub>]dC (to track dCK dependent salvage nucleotide synthesis) for 18 h before DNA extraction (mean  $\pm$ SD; n=3; NT: nucleoside transporter). **(F)** Immunoblot analysis of human acute lymphoblastic leukemia (ALL) cell lines. **(G)** SAMHD1 and dCK expression in human cancer cell line encyclopedia (CCLE) T- and B-ALL models (Ghandi et al. Nature. 2019) and in human patient-derived T and B ALL cell lines (Broad). **(H)** SAMHD1 and dCK expression across murine T and B cell development from the Immgen dataset (Heng et al. Nat Immunol. 2008). **(I)** Immunoblot validation of CEM-YFP control and CEM-SAMHD1 cells. **(J)** CEM-YFP and CEM-SAMHD1 cells treated + 5  $\mu\text{M}$  dG  $\pm$  1  $\mu\text{M}$  PNPI  $\pm$  1  $\mu\text{M}$  dCKi for 24 h. **(K)** Flow cytometry analysis of CEM-YFP and CEM-SAMHD1 cells + 5  $\mu\text{M}$  dG  $\pm$  1  $\mu\text{M}$  PNPI  $\pm$  1  $\mu\text{M}$  dCKi for 24 h (mean $\pm$ SD; n=3; one-way ANOVA corrected for multiple comparisons).

# Supplemental Figure 2

Supporting Data for Figure 1

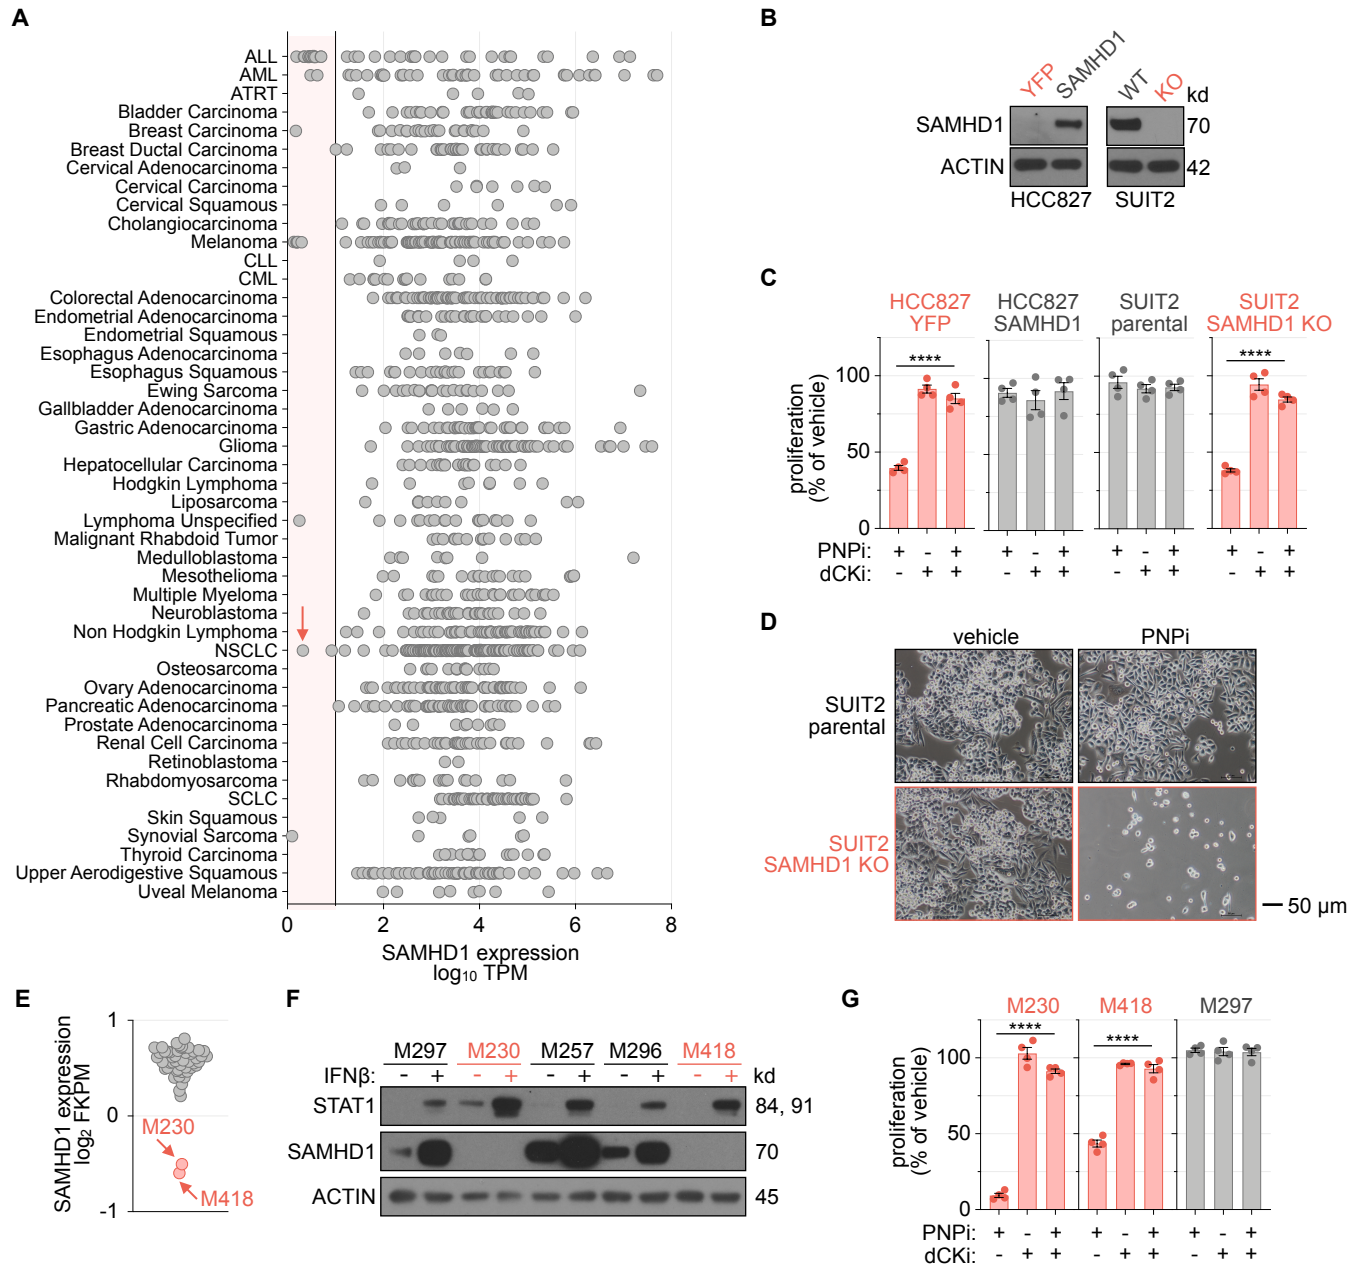

**Figure S2 | SAMHD1 mediates PNPI lethality in solid tumor models. Related to Figure 1. (A)** SAMHD1 expression across cancer cell line encyclopedia (CCLE) models (RNASeq; Ghandi et al. Nature. 2019). HCC827 is indicated. **(B)** Immunoblot validation of SUIT2 SAMHD1 CRISPR/Cas9 knockout (KO) and HCC827 SAMHD1-expressing isogenic cells. **(C)** Cell Titer Glo analysis of solid tumor isogenic cells treated + 5  $\mu$ M dG  $\pm$  1  $\mu$ M PNPI  $\pm$  1  $\mu$ M dCKi for for 72 h (mean $\pm$ SD; n=4; one-way ANOVA corrected for multiple comparisons). **(D)** Representative images of SUIT2 parental and SAMHD1 KO cells at 10x magnification following treatment + 5  $\mu$ M dG  $\pm$  1  $\mu$ M PNPI for 72 h. **(E)** RNAseq analysis of SAMHD1 expression in melanoma patient-derived xenograft (PDX) models. **(F)** Immunoblot analysis of melanoma PDX models treated  $\pm$  100 U/mL human IFN $\beta$  for 24 h. **(G)** Cell Titer Glo analysis of melanoma PDX models treated  $\pm$  1  $\mu$ M PNPI / 5  $\mu$ M dG  $\pm$  1  $\mu$ M dCKi (mean $\pm$ SD; n=4; one-way ANOVA corrected for multiple comparisons). | \*\*\*\* P<0.0001.

# Supplemental Figure 3

Supporting Data for Figures 3 and 4

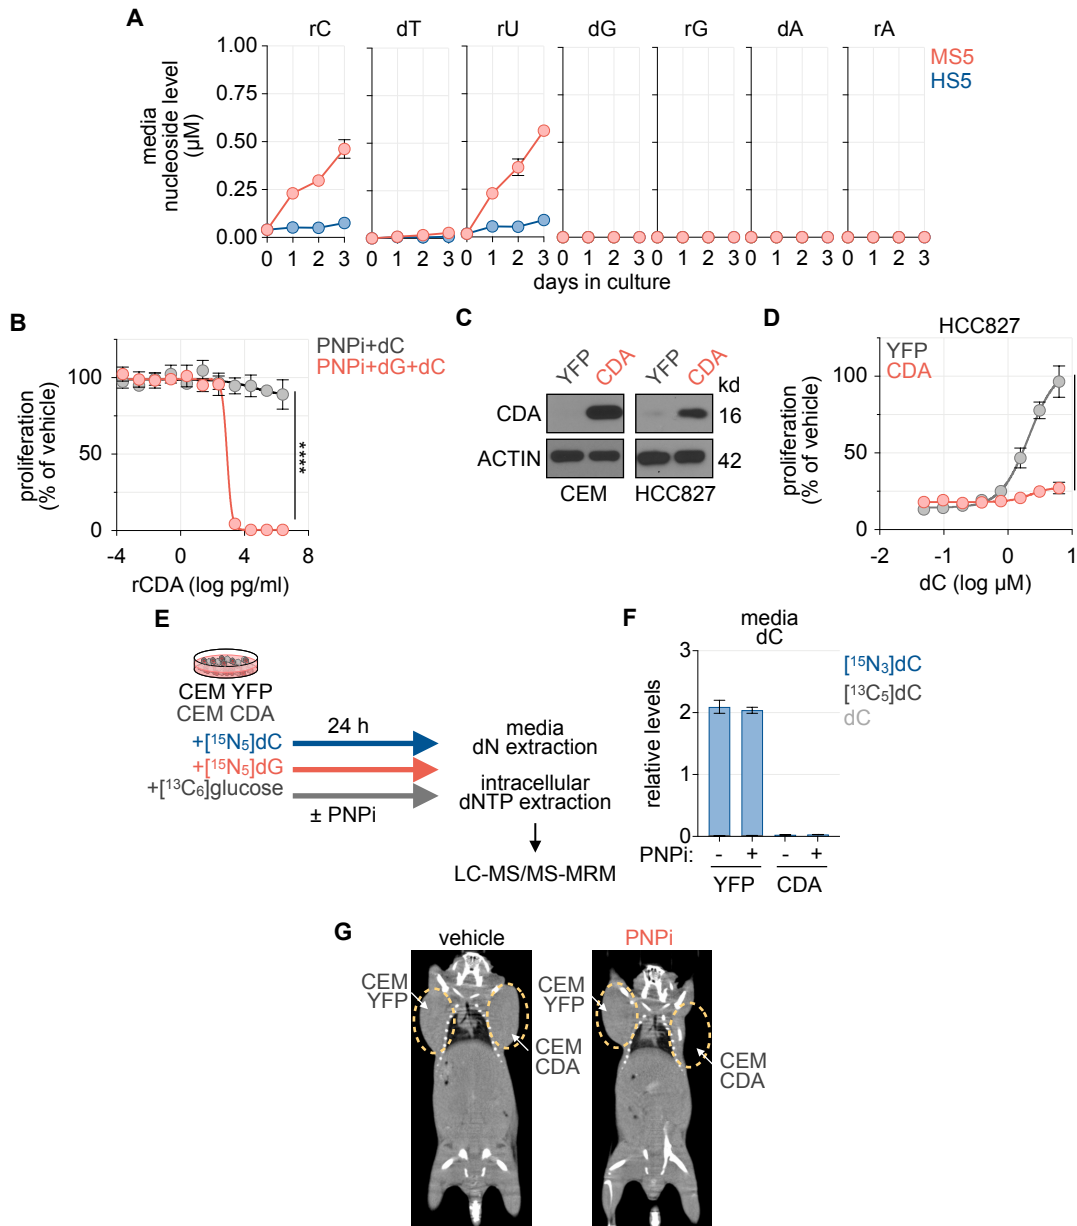

**Figure S3 | dC mitigates PNPI lethality *in vitro* and *in vivo*. Related to Figures 3 and 4. (A)** LC-MS/MS analysis of conditioned media (CM) derived from HS5 or MS5 cells from experiment in **Figure 3C** (mean  $\pm$  SD; n=3). **(B)** Cell Titer Glo analysis of CEM-cells treated + 1  $\mu\text{M}$  PNPI + 5  $\mu\text{M}$  dG + 5  $\mu\text{M}$  dC  $\pm$  indicated recombinant cytidine deaminase (rCDA) for 72 h (n=4; mean $\pm$ SD; unpaired t-test). **(C)** Immunoblot validation of CDA-expressing isogenic CEM and HCC827 cells. **(D)** Cell Titer Glo analysis of HCC827-YFP and -CDA cells treated + 1  $\mu\text{M}$  PNPI + 5  $\mu\text{M}$  dG  $\pm$  a titration of dC for 72 h (n=4; mean $\pm$ SD; unpaired t-test). **(E)** Experimental design for experiment in **Figure 4C**. **(F)** Media deoxycytidine measurements from endpoint of experiment in **Figure 4C**. **(G)** Representative  $\mu\text{CT}$  analysis from endpoint of experiment in **Figure 4D**. | \*\*\* P<0.001; \*\*\*\* P<0.0001.

A

| cluster             | vehicle     | PNPi        |
|---------------------|-------------|-------------|
| <b>TOTAL CELLS</b>  | <b>6701</b> | <b>6412</b> |
| B 1                 | 1756        | 1146        |
| B 2                 | 235         | 636         |
| B 3                 | 370         | 457         |
| B 4                 | 320         | 265         |
| B 5                 | 85          | 131         |
| B 6                 | 80          | 68          |
| B 7                 | 61          | 39          |
| B pre-mem           | 362         | 233         |
| plasma cells        | 11          | 22          |
| T/B doublet         | 79          | 50          |
| CD8 T 1             | 691         | 671         |
| CD8 T 2             | 224         | 237         |
| CD4 T 1             | 1091        | 890         |
| CD4 T 2             | 43          | 53          |
| T <sub>reg</sub>    | 180         | 207         |
| Th1                 | 78          | 73          |
| NK                  | 170         | 182         |
| DC 1                | 156         | 172         |
| DC 2                | 92          | 93          |
| pDC                 | 86          | 95          |
| macrophage (Mk)/DC  | 316         | 297         |
| macrophage (Mk)     | 69          | 188         |
| monocyte/neutrophil | 146         | 207         |

B

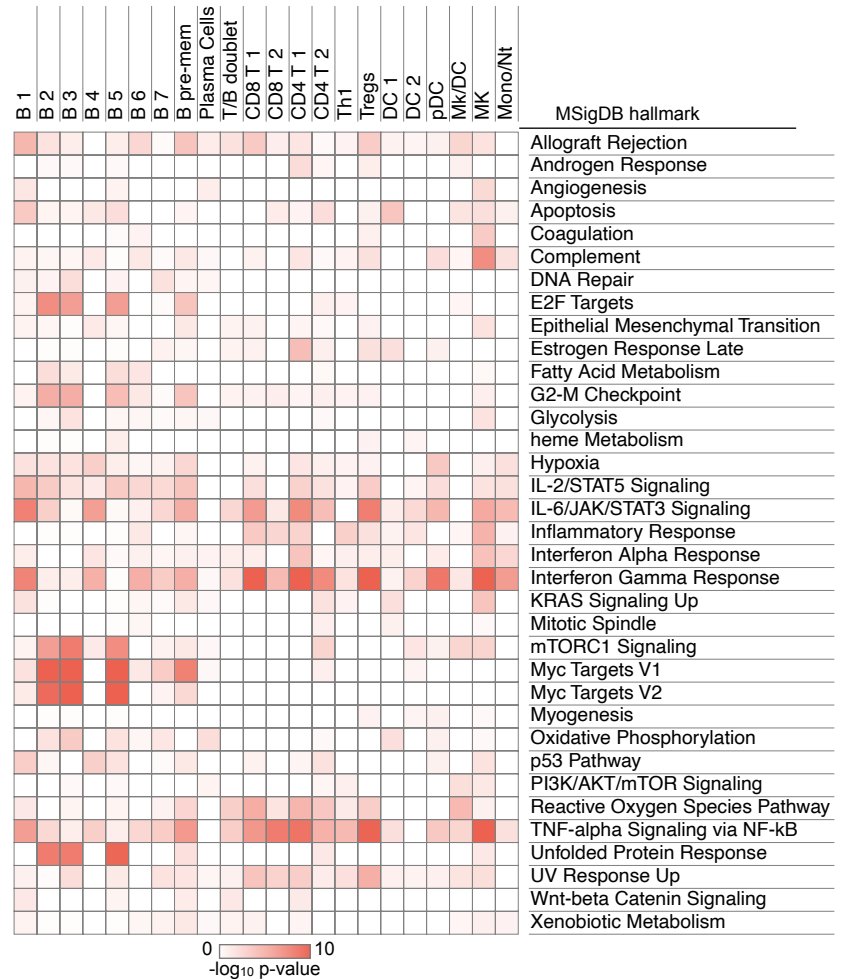

**Figure S4 | scRNAseq analysis of spleen PNPI response. Related to Figure 5. (A)** Summary of spleen scRNAseq cluster composition from experiment in **Figure 5E**. **(B)** Ontology analysis of significantly altered genes in clusters from experiment in **Figure 5E**.

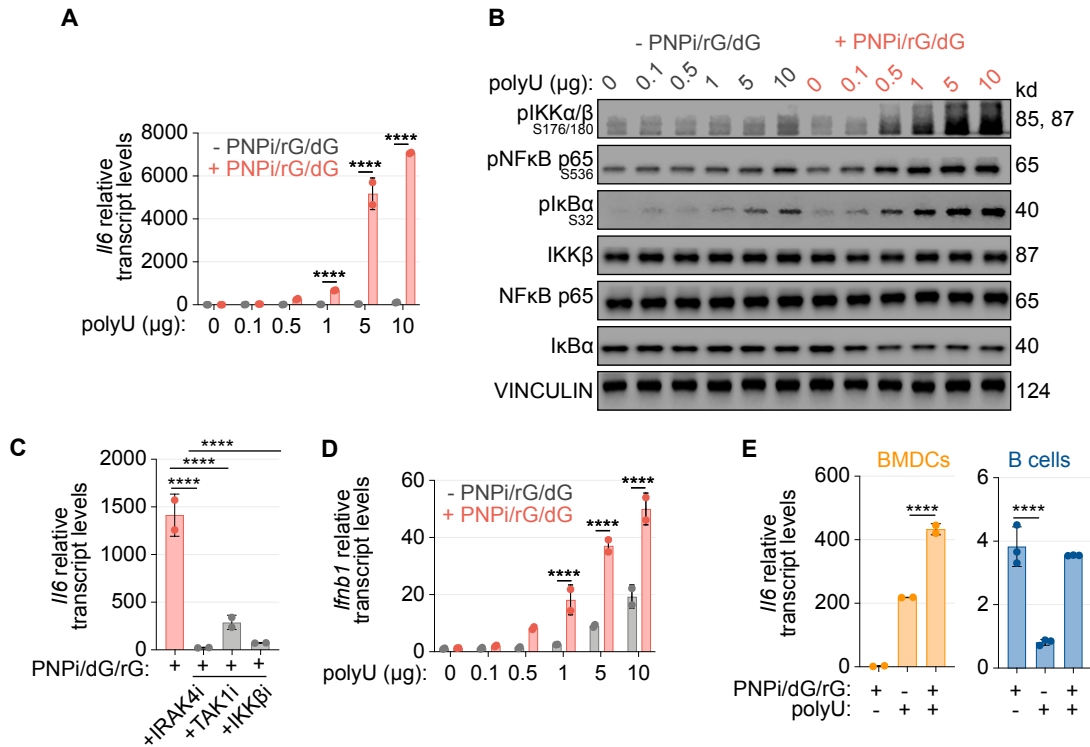

**Figure S5 | PNPI activates TLR7 in BMDMs. Related to Figure 7. (A)** RT-PCR analysis of BMDM treated  $\pm$  1  $\mu$ M ulodesine (PNPI) / 5  $\mu$ M guanosine (rG) and 5  $\mu$ M deoxyguanosine (dG)  $\pm$  polyU ssRNA (complexed with DOTAP) for 4 h (mean $\pm$ SD; n=4; one-way ANOVA corrected for multiple comparisons). **(B)** Immunoblot analysis of BMDM treated  $\pm$  1  $\mu$ M PNPI / 5  $\mu$ M rG / 5  $\mu$ M dG  $\pm$  polyU (complexed with DOTAP) for 4 h. **(C)** RT-PCR analysis of BMDM treated  $\pm$  1  $\mu$ M PNPI + 5  $\mu$ M dG + 5  $\mu$ M rG / 5  $\mu$ g polyU  $\pm$  1  $\mu$ M PF-06650833 (IRAK4i)  $\pm$  10  $\mu$ M takinib (TAK1i)  $\pm$  5  $\mu$ M TPCA-1 (IKK $\beta$ i) for 4 h (mean $\pm$ SD; n=4; one-way ANOVA corrected for multiple comparisons). **(D)** RT-PCR analysis of BMDM treated  $\pm$  1  $\mu$ M PNPI / 5  $\mu$ M guanosine (rG) and deoxyguanosine (dG)  $\pm$  polyU (complexed with DOTAP) for 4 h (mean $\pm$ SD; n=4; one-way ANOVA corrected for multiple comparisons). **(E)** RT-PCR analysis of bone marrow-derived / FLT3 ligand-differentiated murine dendritic cell (BMDC) cultures and CD43- murine splenocyte (B cell) cultures treated *ex vivo*  $\pm$  1  $\mu$ M PNPI 5  $\mu$ M 5  $\mu$ M dG 5  $\mu$ M rG  $\pm$  5  $\mu$ g polyU ssRNA (complexed with DOTAP) for 4 h (mean $\pm$ SD; n=4; one-way ANOVA corrected for multiple comparisons). | \*\*\*\* P<0.0001.

# Supplemental Figure 6

Supporting Data for Figure 8

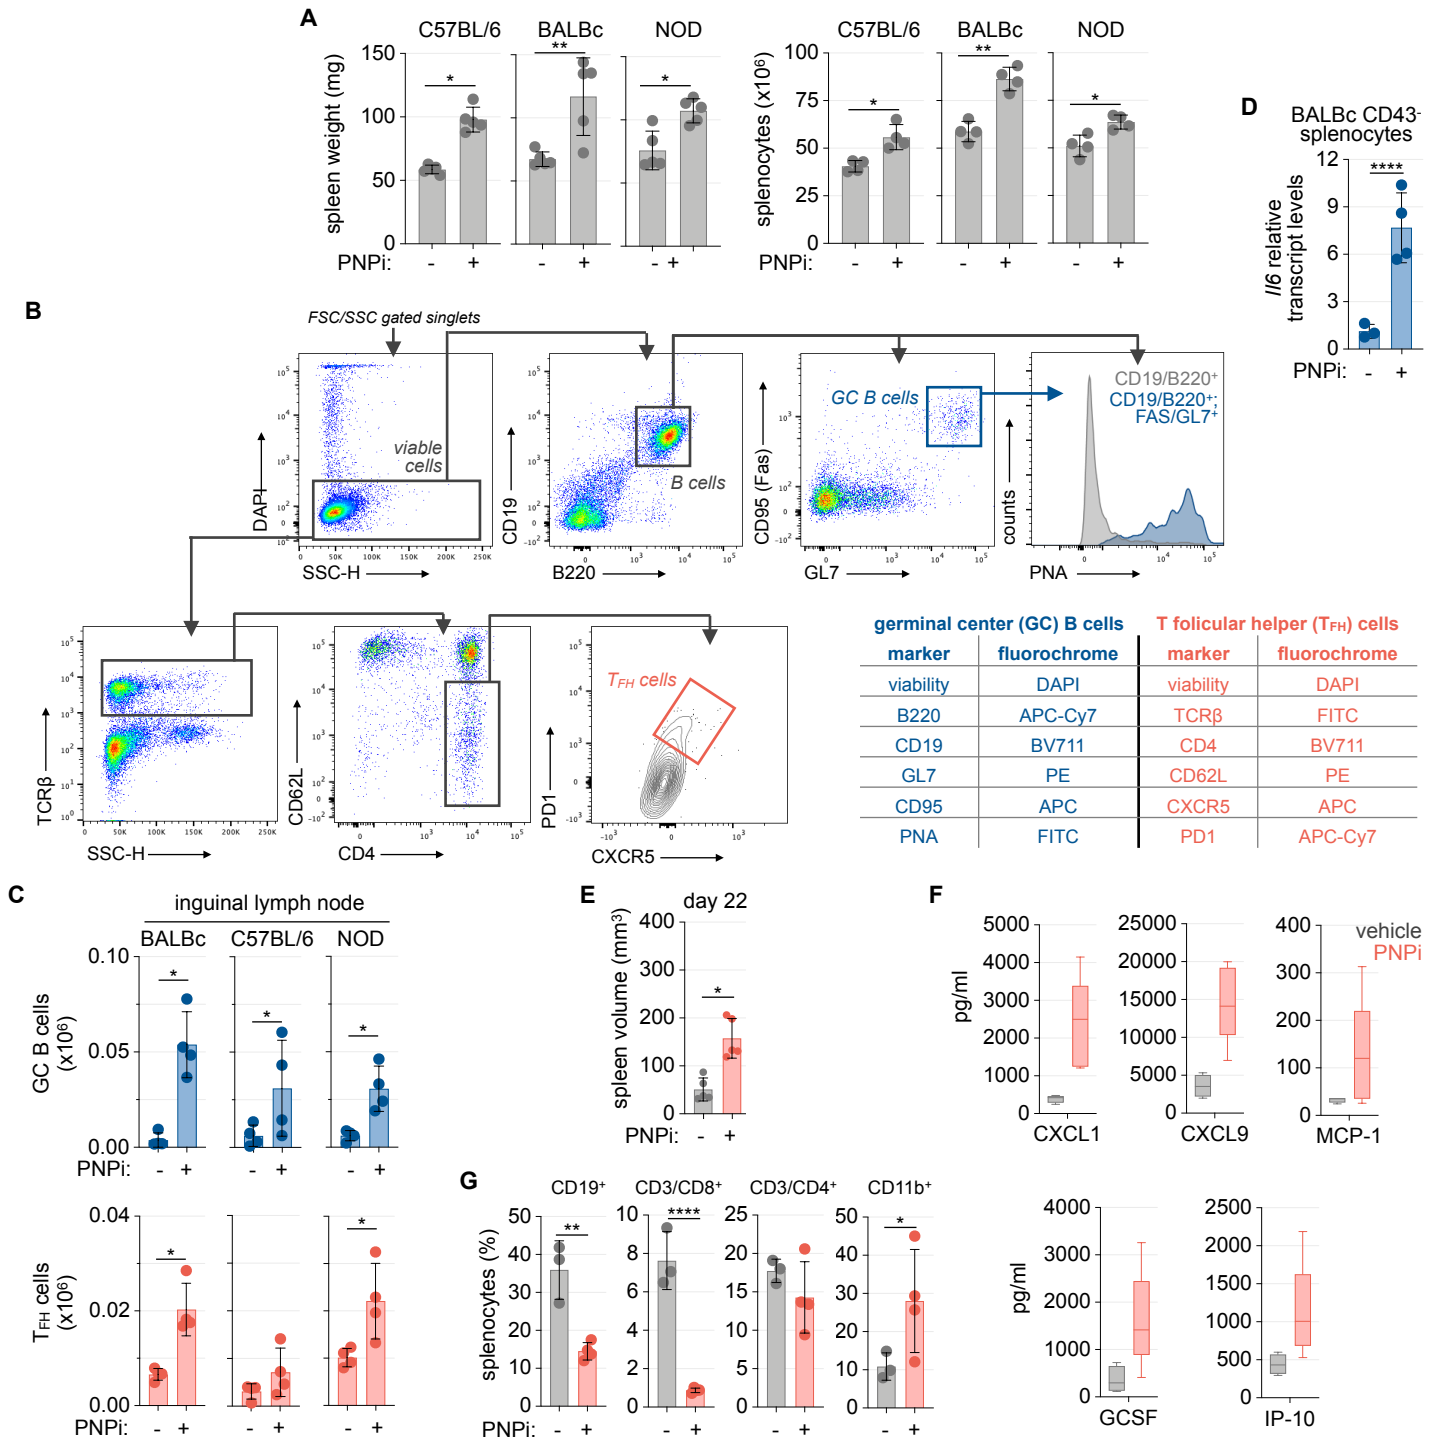

**Figure S6 | PNPI promotes germinal center formation and accelerates autoimmunity. Related to Figure 8. (A)** Analysis of C57BL/6, BALBc and NOD mice treated  $\pm$  100 mg/kg ulodesine (PNPI; q.d.) for 14 d. Endpoint spleen weight and cellularity is indicated ( $n=4$ /group; two-tailed Mann-Whitney test). **(B)** Gating strategy and staining panel composition for the identification of germinal center (GC) B cells and T follicular helper (T<sub>FH</sub>) cells by flow cytometry. **(C)** Quantification of PNPI induced alterations in total inguinal lymph node (iLN) GC B cell and T<sub>FH</sub> abundance from BALBc, C57BL/6 mice and NOD mice treated  $\pm$  100 mg/kg PNPI (q.d.) from experiment in **Figure 8A** ( $n=4$ /group; two-tailed Mann-Whitney test). **(D)** RT-PCR analysis spleen-purified CD43<sup>-</sup> B cells from BALBc mice treated  $\pm$  100 mg/kg PNPI (p.o., q.d.) for 14 d from endpoint of experiment in **Figure 8A** (mean $\pm$ SD;  $n=4$ /group; two-tailed Mann-Whitney test). **(E)** Spleen volume obtained by ultrasound evaluation at day 22 from experiment in **Figure 8E** (mean $\pm$ SD;  $n=4$  vehicle;  $n=5$  PNPI; unpaired t-test) **(F)** Extended luminex cytokine analysis from endpoint of experiment in **Figure 8E**. **(G)** Flow cytometry analysis of spleen cellular composition in female MRL-LPR mice treated  $\pm$  PNPI *ad. lib.* for 35 d (mean $\pm$ SD;  $n=3$  vehicle;  $n=4$  PNPI). | \*  $P<0.05$ ; \*\*  $P<0.01$ ; \*\*\*\*  $P<0.0001$ .

# Immunoblot Source Data

**Figure S1F**

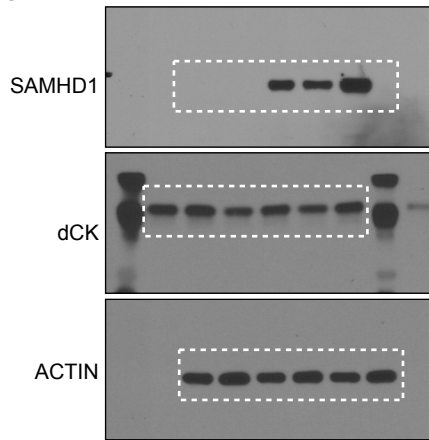

**Figure S1J**

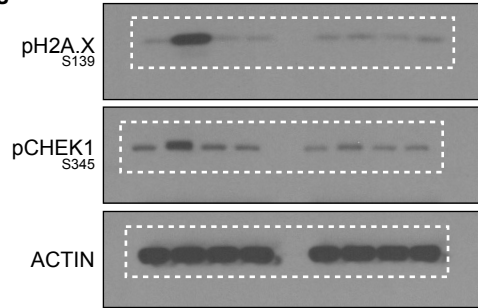

**Figure S1I**

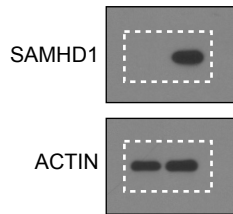

**Figure S2F**

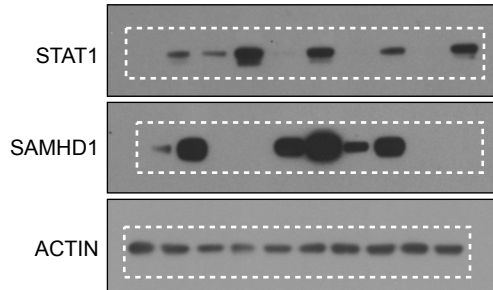

**Figure S2B**

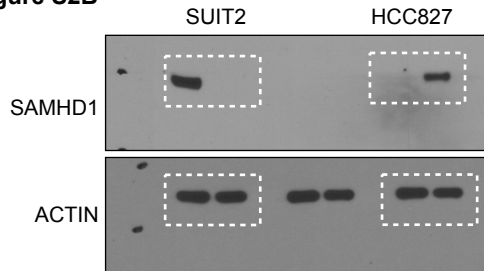

**Figure 6I**

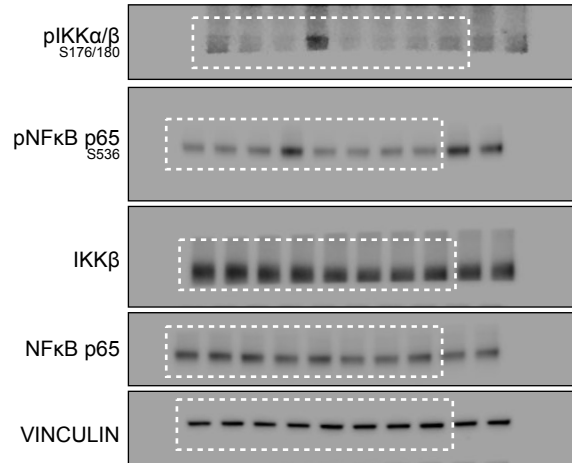

**Figure S5B**

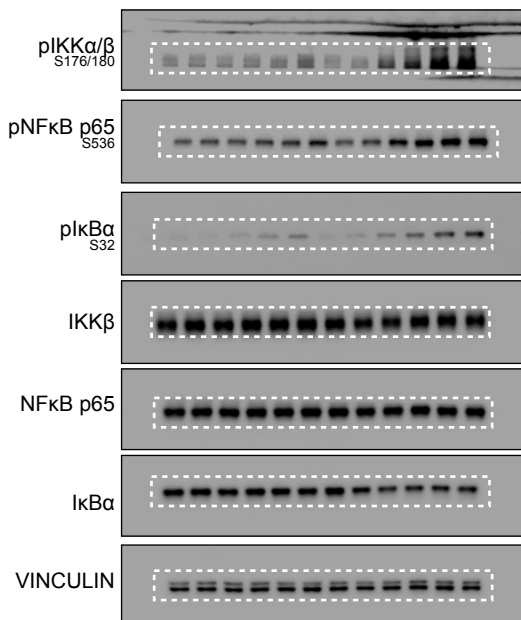

## SUPPLEMENTAL METHODS

### Primary Cell Culture

For the differentiation of murine bone marrow-derived macrophages (BMDM) or bone-marrow derived dendritic cells (BMDC), femur and tibiae were isolated from mice and stored on ice in PBS +5% FBS until processing. Bone marrow was flushed using a 25 gauge needle in 10 mL of PBS +5%FBS, centrifuged at 450xg for 4 minutes at 4°C, and resuspended in 2 mL of ACK lysis buffer. After 10 minutes of incubation, 2 mL of PBS +5%FBS was added to quench the reaction, suspensions were passed through a 70 µm nylon mesh filter and centrifuged at 450xg for 4 minutes at 4°C. For BMDM differentiation, bone marrow-derived cells were resuspended in 10 mL of DMEM +10%FBS +1x sodium pyruvate + 50 µM BME supplemented with 50 ng/mL M-CSF. For BMDC differentiation cells were resuspended in 10 mL of RPMI +10% FBS +1x sodium pyruvate +50 µM BME supplemented with 200 ng/mL FLT3L.  $1 \times 10^7$  cells were plated in 10 cm plates and media was refreshed every 3 days. After 7 days of differentiation, cells were washed with PBS and collected by scraping with a rubber policeman in 5 mL of 10 mM EDTA in PBS. Cell lineage was confirmed by flow cytometry.

For the isolation of murine B lymphocytes, spleens from indicated mice were diced and mashed through a 70 µm nylon mesh strainer using a 1 mL syringe plunger in 10 mL of PBS +5% FBS buffer to obtain a single cell suspension. For red blood cell lysis, suspensions were centrifuged at 450xg for 4 minutes at 4°C, decanted, and cell pellets were resuspended in 3 mL of ACK lysis buffer and incubated for 3 minutes at room temperature. ACK was quenched by adding 10 mL of PBS +5% FBS buffer and passed through a 40 µm nylon mesh filter.  $1 \times 10^7$  splenocytes were incubated with 10 µL of anti-CD43 MicroBeads in 100 µL of PBS +0.5% BSA +2mM EDTA (MACS buffer) for 15 minutes at 4°C. The cell suspension was passed through an MS column on an OctoMACS Separator and the flow-through (B cell fraction) was collected. The purity of the enriched fraction was evaluated by flow cytometry.

### scRNA-seq

**Sample preparation:** Freshly isolated spleens from C57BL/6 mice 6 hours after treatment with 100 mg/kg ulodesine (PNPi; 100 µL p.o.) or vehicle (n=3 / group) were mashed through a 70 µm nylon mesh strainer using a 1 mL syringe plunger to obtain a single cell suspension. For red blood cell lysis, suspensions were centrifuged at 300xg for 2 minutes at 4°C, decanted, and cell pellets were resuspended in 3 mL of ACK lysis buffer and incubated for 3 minutes at room temperature. ACK was quenched by adding 10 mL of scRNAseq



buffer (PBS without Ca<sup>++</sup>/Mg<sup>++</sup> +0.04% BSA). Samples were centrifuged and washed twice with scRNAseq buffer. 3 samples from each treatment group (vehicle or PNPI) were pooled 1:1:1 at 1000 cells /  $\mu$ L in 1 mL and viability was confirmed to be > 70 % using trypan blue exclusion. Single cell capture and library construction was performed at the UCLA Technology Center for Genomics and Bioinformatics (TCGB) core facility using the 10x Genomics 3'GEX kit. Libraries were sequenced by NextSeq500 High Output at 1x75 read length.

**scRNA-seq bioinformatics analysis:** Samples were aligned to the mm10 mouse genome using CellRanger (version 4.0.0). The aligned datasets were processed with the Seurat (version 4.0.4) R package in R Studio (version 2021.09.1, R version 4.1.2) (1). For quality control, cells with greater than 20% mitochondrial gene expression and cells with a number of unique molecular identifiers (nUMI) lower than 200 were excluded. Features (genes) not supported by a minimum of 20 cells were excluded. The data from the control and treated samples were integrated using Seurat's IntegrateData function following their default processing pipeline. The integrated data were scaled; any effects of the cell cycle on the single cells' gene expression profile were reduced by regressing out the CellCycle scores of each cell. We regressed the score differences between the S scores and G2M scores of each cell, which were computed using Seurat's CellCycleScoring function. Prior to the scoring, we converted Seurat's built-in human cell cycle genes to their murine counterpart using the biomaRt R package (2). We applied the principal component analysis (PCA) dimensionality reduction. Subsequently, based on the latter's top 30 principal components (PCs), we generated the Uniform Manifold Approximation and Projection (UMAP)-based visualization, nearest-neighbor computation, and cell clustering. Cluster-specific differentially expressed genes (DEGs), computed by Seurat's FindAllMarkers function, were used to identify the cell types of each cluster. Feature plots were generated using the FeaturePlot function (color contrast was increased by using the gene expression-specific color cutoffs for the 10th and 90th quantiles). We obtained treatment-specific DEGs by applying the FindMarkers function to the control and treated cell subsets of each cluster. Gene ontology was analyzed using the built-in Seurat function for EnrichR (DEenrichRPlot) to generate the top 100 DEGs against the MSigDB Hallmark 2020 gene sets.

### **Flow Cytometry**

All flow cytometry data were acquired on a five-laser BD LSRII and analyzed using FlowJo software. For figure data visualization anti-human markers are annotated with "h".

**ATO immuno-phenotyping:** ATO cells were harvested by adding PBS + 0.5% bovine serum albumin + 2 mM EDTA to each well. The organoid was disaggregated by pipetting and passage through a 50 µm nylon mesh strainer and counted using trypan blue exclusion. CD4/CD8 double-negative or double-positive cells were evaluated within the singlet DAPI<sup>-</sup> hCD45<sup>+</sup> hCD19<sup>-</sup> hCD56<sup>-</sup> hCD34<sup>-</sup> gated population.

**Tissue immuno-phenotyping:** Tissues were stored on ice in FACS buffer (PBS+1% FBS) until processing. Spleen, lymph node, and thymic implant tissues were diced and mashed through a 70 µm nylon mesh strainer using a 1 mL syringe plunger in 10 mL of FACS buffer to obtain a single-cell suspension. For red blood cell lysis of spleen samples, suspensions were centrifuged at 450 g for 4 minutes at 4°C, decanted, and cell pellets were resuspended in 3 mL of ACK lysis buffer and incubated for 3 minutes at room temperature. ACK was quenched by adding 10 mL of FACS buffer and samples were passed through a 40 µm nylon mesh filter. 1x10<sup>6</sup> cells were transferred to a 1.5 mL Eppendorf tube, centrifuged at 450 g for 4 minutes at 4°C, decanted, and resuspended in 100 µL of FACS buffer supplemented with 1:200 diluted fluorochrome-conjugated antibodies and 1:100 diluted Fc-block (anti-mouse CD16/32). After a 20 minute incubation at 4°C, samples were centrifuged and washed twice with 1 mL of FACS buffer before resuspension in 500 µL of FACS buffer + 250 ng/mL DAPI before data acquisition. Antibodies are reported in **Supplemental Table 1**.

**Peripheral blood immuno-phenotyping:** 200 µL of blood was collected in lithium heparin-coated tubes (BD) using the retro-orbital technique using heparin-coated capillary tubes and stored on ice until processing. Blood was added to 10 mL of ACK buffer and incubated at room temperature for 10 minutes. ACK was quenched by adding 10 mL of FACS buffer and samples were passed through a 40 µm nylon mesh filter. Samples were stained with fluorochrome-conjugated antibodies as described for “tissue immuno-phenotyping”.

**Cell Trace Violet (CTV) T cell proliferation:** Splenocytes were isolated from C57BL/6 mice as described for “tissue immuno-phenotyping”. 1x10<sup>7</sup> splenocytes were resuspended in 1 mL of PBS + 5 µM CTV and incubated in a 37°C water bath for 20 minutes. Stained cells were washed, suspended in 200 µL of RPMI +10%DFBS +30 U/mL IL-2 ± 1 µM PNPi / 5 µM dG with 5 µL of anti-mouse CD3/CD28 DynaBeads. After 72 h of culture, samples were stained with anti-mouse CD3, CD4, and CD8a antibodies and analyzed using flow cytometry. CTV dye dilution was evaluated within CD3/CD4 or CD3/CD8a gated populations.

**AnnexinV/PI:** Following treatment, cells were washed twice with PBS and incubated with AnnexinV-FITC and propidium iodide diluted in 1x annexin binding buffer per manufacturer's instructions.

## **Mass Spectrometry**

**Plasma/Media metabolite extraction, DNA isolation/hydrolysis, and LC-MS/MS-MRM analysis:** For stable isotope tracing experiments, cells were collected, washed twice with PBS, and plated at  $1 \times 10^6$  cells in 2 mL glucose-free RPMI +10% dialyzed FBS +1 g/L [ $^{13}\text{C}_6$ ]glucose  $\pm$  5  $\mu\text{M}$  [ $^{15}\text{N}_5$ ]dG  $\pm$  5  $\mu\text{M}$  [ $^{15}\text{N}_3$ ]dC and treated as indicated. Media and DNA analysis were performed on samples obtained from a single well. Intracellular metabolite analysis was performed on samples plated and treated in parallel.

For analysis of media nucleoside abundance and stable isotope composition, a modified version of a previously reported method was applied (3). At experimental endpoints, media was collected in a 1.5 mL microcentrifuge tube, centrifuged at 450xg for 5 minutes at 4°C, and the supernatant was stored at -80°C. For metabolite extraction, 20  $\mu\text{L}$  of supernatant was mixed with 80  $\mu\text{L}$  of 100% MeOH containing stable isotope- labeled nucleoside internal standards (0.5  $\mu\text{M}$  [ $\text{U-}^{15}\text{N}/^{13}\text{C}$ ]r/dNs). MeOH-extracted samples were incubated at -80°C for 24 hours, centrifuged at 12,000 g for 5 minutes at 4°C and the cleared supernatant was transferred to an HPLC injector vial for analysis.

For analysis of plasma nucleoside and uracil levels, blood was collected using a heparin-coated capillary tube by the retro-orbital technique and transferred to a lithium-heparin coated tube on ice. Samples were centrifuged at 450xg for 5 minutes at 4°C and the plasma supernatant was stored at -80°C. For metabolite extraction, 20  $\mu\text{L}$  of plasma was mixed with 80  $\mu\text{L}$  of 100% MeOH containing stable isotope-labeled nucleoside internal standards (0.5  $\mu\text{M}$  [ $\text{U-}^{15}\text{N}/^{13}\text{C}$ ]r/dNs). MeOH-extracted samples were incubated at -80°C for 24 hours, centrifuged at 12,000 g for 5 minutes at 4°C and the cleared supernatant was transferred to an HPLC injector vial for analysis.

For analysis of stable isotope labeling of nucleosides in DNA, a modified version of a previously reported method was applied (4). Cells were harvested by trypsinization, genomic DNA was extracted using the Quick-gDNA MiniPrep kit, and DNA was hydrolyzed to nucleosides using the DNA Degradase Plus kit following manufacturer-supplied instructions. In the final step of purification, 50  $\mu\text{L}$  of  $\text{H}_2\text{O}$  was used to elute DNA into 1.5 mL microcentrifuge tubes. 50  $\mu\text{L}$  of a DNA nuclease solution (10X buffer/DNA Degradase Plus/ $\text{H}_2\text{O}$ ;

2.5/1/1.5) was added to 20  $\mu\text{L}$  of eluted genomic DNA in an HPLC injector vial. Samples were incubated overnight at 37°C before analysis.

LC-MS/MS-MRM of hydrolyzed DNA, plasma, or media was performed as previously described (4). 5  $\mu\text{L}$  of the sample was injected onto a porous graphitic carbon column (Thermo Fisher Scientific Hypercarb, 100 x 2.1 mm, 5  $\mu\text{m}$  particle size) equilibrated in solvent A (0.1% formic acid in MiliQ-purified/LC-Pak treated  $\text{H}_2\text{O}$ ) and eluted (700  $\mu\text{L}/\text{min}$ ) with an increasing concentration of solvent B (0.1% formic acid in acetonitrile) using min/%B/flow rates ( $\mu\text{L}/\text{min}$ ) as follows: 0/2/700, 3/80/700, 4/80/700, 4.5/2/700, 7/2/700. The effluent from the column was directed to an Agilent Jet Stream ion source connected to a triple quadrupole mass spectrometer (Agilent 6460) operating in the multiple reaction monitoring (MRM) mode using previously optimized settings. The peak areas for each target molecule (precursor→fragment ion transitions) at predetermined retention times were recorded using Agilent MassHunter software. Peak areas were normalized to nucleoside internal standard signals. An external standard curve was applied to determine nucleoside or uracil concentrations. Experimental and standard samples were processed together to minimize variation.

***Intracellular nucleotide extraction and LC-MS/MS-MRM analysis:*** For intracellular nucleotide analysis, a modified version of a previously reported method was utilized (4). After treatment, cells were collected, centrifuged at 450xg for 4 minutes at 4°C and washed twice with 1 mL of 150 mM  $\text{NH}_4$  acetate; and metabolite extraction buffer (80% MeOH in MiliQ-purified/LC-Pak treated  $\text{H}_2\text{O}$  + stable isotope-labeled nucleotide and amino acid internal standards: [ $^{13}\text{C}$ ,  $^{15}\text{N}$ ]amino acids (50  $\mu\text{M}$ ) and [ $\text{U-}^{15}\text{N}/^{13}\text{C}$ ]r/dNTPs (25  $\mu\text{M}$ ), [ $\text{U-}^{15}\text{N}/^{13}\text{C}$ ]r/dNMPs (5  $\mu\text{M}$ ), and [ $\text{U-}^{15}\text{N}/^{13}\text{C}$ ]r/dNs (1  $\mu\text{M}$ )) was added to each sample for a final protein concentration of 0.4  $\mu\text{g} / \mu\text{L}$ . Samples were incubated on ice for 10 minutes, scraped, transferred to 1.5 mL microcentrifuge tubes, vigorously vortexed, and placed on dry ice until sample collection was completed. After incubation at -80°C for 30 minutes, samples were centrifuged at 12,000xg for 15 minutes at 4°C to remove insoluble material. The protein-containing pellet was resuspended in 500  $\mu\text{L}$  of tissue lysis buffer (50 mM ammonium bicarbonate pH 7.2, 0.5% sodium deoxycholate, 12 mM sodium laurel sarcosine), incubated at 4°C for 15 minutes, sonicated and evaluated using the BCA method to determine protein content. In parallel, MeOH-extracted supernatants were transferred to 1.5 mL microcentrifuge tubes and dried in a speed-vac overnight. Dried metabolite pellets were reconstituted in MiliQ-purified/LC-Pak treated  $\text{H}_2\text{O}$  at 5  $\mu\text{L}$  for each 100  $\mu\text{L}$  of metabolite extraction buffer dried (samples were concentrated 20x). Reconstituted samples were vortexed and transferred to HPLC injector vials. 5  $\mu\text{L}$  was injected directly onto a Hypercarb column (100x2.1 mm, 5  $\mu\text{m}$  particle size) equilibrated

in solvent A (5 mM hexylamine and 0.5% diethylamine in MiliQ-purified/LC-Pak treated H<sub>2</sub>O, pH adjusted to 10.0 using glacial acetic acid) and eluted (200  $\mu$ L/min) with an increasing concentration of solvent B (100% acetonitrile) at the following min/%B/flow rates ( $\mu$ L/min): 0/5/200, 15/60/200, 15.5/60/600, 18/5/600, 20.5/5/200, 23/5/200. The effluent from the column was directed to an Agilent Jet Stream ion source connected to a triple quadrupole mass spectrometer (Agilent 6460) operating in the multiple reaction monitoring (MRM) mode using previously optimized settings. The peak areas for each nucleotide (precursor $\rightarrow$ fragment ion transitions) at predetermined retention times were recorded using Agilent MassHunter software and were normalized to nucleotide internal standards. An external standard curve was applied to determine nucleotide concentrations which were normalized to the protein content of individual samples.

***Tumor interstitial fluid analysis:*** Immediately after isolation, tumors were placed on a 70  $\mu$ m nylon mesh filter in a 50 mL conical tube and centrifuged at 500xg for 10 minutes at 4°C. Tumor interstitial fluid was collected and processed for LC-MS/MS analysis as derived above for cell culture media samples.

## REFERENCES

1. Hao, Y, Hao, S, Andersen-Nissen, E, Mauck, WM, Zheng, S, Butler, A, Lee, MJ, Wilk, AJ, Darby, C, Zager, M, Hoffman, P, Stoeckius, M, Papalexi, E, Mimitou, EP, Jain, J, Srivastava, A, Stuart, T, Fleming, LM, Yeung, B, Rogers, AJ, McElrath, JM, Blish, CA, Gottardo, R, Smibert, P, Satija, R. Integrated analysis of multimodal single-cell data. *Cell*. 2021;184(13):3573–3587. e29.
2. Durinck, S, Spellman, PT, Birney, E, Huber, W. Mapping identifiers for the integration of genomic datasets with the R/Bioconductor package biomaRt. *Nat Protoc*. 2009;4(8):1184–1191.
3. Liang, K, Abt, ER, Le, TM, Cho, A, Dann, AM, Cui, J, Li, L, Rashid, K, Creech, AL, Wei, L, Ghukasyan, R, Rosser, EW, Wu, N, Carlucci, G, Czernin, J, Donahue, TR, Radu, CG. STING-driven interferon signaling triggers metabolic alterations in pancreas cancer cells visualized by [<sup>18</sup>F]FLT PET imaging. *Proc Natl Acad Sci U S A*. 2021;118(36):e2105390118.
4. Le, TM, Poddar, S, Capri, JR, Abt, ER, Kim, W, Wei, L, Uong, NT, Cheng, CM, Braas, D, Nikanjam, M, Rix, P, Merkurjev, D, Zaretsky, J, Kornblum, HI, Ribas, A, Herschman, HR, Whitelegge, J, Faull, KF, Donahue, TR, Czernin, J, Radu, CG. ATR inhibition facilitates targeting of leukemia dependence on convergent nucleotide biosynthetic pathways. *Nat Commun*. 2017;8(1):241.

**SUPPLEMENTAL TABLE 1**

| REAGENT or RESOURCE                                       | SOURCE                    | IDENTIFIER                      |
|-----------------------------------------------------------|---------------------------|---------------------------------|
| <b>Antibodies</b>                                         |                           |                                 |
| anti-ACTIN, mouse monoclonal                              | Cell Signaling Technology | Cat#3700; RRID:AB_2242334       |
| anti-VINCULIN, rabbit monoclonal                          | Cell Signaling Technology | Cat#13901; RRID:AB_2728768      |
| anti-SAMHD1, mouse monoclonal                             | ThermoFisher Scientific   | Cat# MA5-25354; RRID:AB_2725288 |
| anti-DCK, mouse monoclonal                                | MilliporeSigma            | Cat# MABC188                    |
| anti-pCHEK1-S345, rabbit monoclonal                       | Cell Signaling Technology | Cat#2348; RRID:AB_331212        |
| anti-pH2AX-S139, rabbit monoclonal                        | Cell Signaling Technology | Cat#9718; RRID:AB_2118009       |
| anti-STAT1, rabbit monoclonal                             | Cell Signaling Technology | Cat#14994; RRID:AB_2737027      |
| anti-pIKK $\alpha$ / $\beta$ -S176/180, rabbit monoclonal | Cell Signaling Technology | Cat#2697; RRID:AB_2079382       |
| anti-pNF $\kappa$ B p65-S536, rabbit monoclonal           | Cell Signaling Technology | Cat#3033; RRID:AB_331284        |
| anti-pI $\kappa$ B $\alpha$ -S32, rabbit monoclonal       | Cell Signaling Technology | Cat#2859; RRID:AB_561111        |
| anti-IKK $\beta$ , rabbit monoclonal                      | Cell Signaling Technology | Cat#11930; RRID:AB_2687618      |
| anti-pNF $\kappa$ B p65, rabbit monoclonal                | Cell Signaling Technology | Cat#8242; RRID:AB_10859369      |
| anti-I $\kappa$ B $\alpha$ , 4814                         | Cell Signaling Technology | Cat#4814; RRID:AB_390781        |
| anti-RABBIT IgG, HRP-LINKED, goat polyclonal              | Cell Signaling Technology | Cat#7074; RRID:AB_2099233       |
| anti-MOUSE IgG, HRP-LINKED, goat polyclonal               | Cell Signaling Technology | Cat#7076; RRID:AB_330924        |
| anti-human CD45, FITC conjugate,                          | Beckman Coulter           | Cat#IM0782U; RRID:AB_131000     |
| anti-human CD4, BV711 conjugate                           | BioLegend                 | Cat#300557; RRID:AB_2564392     |
| anti human, CD8, PE conjugate                             | BioLegend                 | Cat#344705; RRID:AB_1953243     |
| anti-mouse CD45, FITC conjugate                           | BioLegend                 | Cat#103107; RRID:AB_312972      |
| anti-mouse CD4, BV711 conjugate                           | BioLegend                 | Cat#100550; RRID:AB_2562099     |
| anti-mouse CD8, PE conjugate                              | BioLegend                 | Cat#100708; RRID:AB_312747      |
| anti-mouse B220, APC-Cy7 conjugate                        | BioLegend                 | Cat#103223; RRID:AB_313006      |
| anti-mouse CD11b, FITC conjugate                          | BioLegend                 | Cat#101206; RRID:AB_312789      |
| anti-mouse CD11c, APC conjugate                           | BioLegend                 | Cat#117309; RRID:AB_313778      |
| anti-mouse F4/80, PE conjugate                            | BioLegend                 | Cat#123109; RRID:AB_893498      |
| anti-mouse CD19, BV711 conjugate                          | BioLegend                 | Cat#115555; RRID:AB_2565970     |
| anti-mouse GL7, PE conjugate                              | BioLegend                 | Cat#144607; RRID:AB_2562925     |
| anti-mouse CD95 (FAS), APC conjugate                      | BioLegend                 | Cat#152603; RRID:AB_2632898     |
| anti-mouse TCR $\beta$ , FITC conjugate                   | BioLegend                 | Cat#109205; RRID:AB_313428      |
| anti-mouse CD62L, PE conjugate                            | BioLegend                 | Cat#104407; RRID:AB_313094      |
| anti-mouse PD1, APC-Cy7 conjugate                         | BioLegend                 | Cat#135223; RRID:AB_2563522     |

|                                                                              |                                |                             |
|------------------------------------------------------------------------------|--------------------------------|-----------------------------|
| anti-mouse CXCR5, APC conjugate                                              | BioLegend                      | Cat#145505; RRID:AB_2561969 |
| TruStain FcX (anti-mouse CD16/32)                                            | BioLegend                      | Cat#101319; RRID:AB_1574973 |
|                                                                              |                                |                             |
| <b>Bacterial and virus strains</b>                                           |                                |                             |
| Stbl3 chemically competent E. Coli                                           | ThermoFisher Scientific        | Cat#C737303                 |
|                                                                              |                                |                             |
| <b>Chemicals, peptides, and recombinant proteins</b>                         |                                |                             |
| DMEM                                                                         | Corning                        | Cat#10-107-CV               |
| RPMI                                                                         | Corning                        | Cat#MT10040CV               |
| Glucose-free RPMI                                                            | Corning                        | Cat#MT10043CV               |
| Fetal bovine serum                                                           | Omega Scientific               | Cat#FB-11                   |
| Fetal bovine serum dialyzed                                                  | Omega Scientific               | Cat#FB-03                   |
| B27 supplement                                                               | ThermoFisher Scientific        | Cat#17504044                |
| Glutamax                                                                     | ThermoFisher Scientific        | Cat#35050061                |
| OptiMEM                                                                      | ThermoFisher Scientific        | Cat#31985-062               |
| Lipofectamine 3000                                                           | ThermoFisher Scientific        | Cat#L3000001                |
| DOTAP                                                                        | MilliporeSigma                 | Cat#11202375001             |
| Ulodesine (PNPi)                                                             | WuXi AppTec                    | N/A                         |
| (R)-DI-87 (dCKi)                                                             | Poddar et al., 2019.           | N/A                         |
| Human IFN $\beta$                                                            | PBL Assay Science              | Cat#11415-1                 |
| Mouse IFN $\beta$                                                            | PBL Assay Science              | Cat#11410-2                 |
| [ <sup>13</sup> C <sub>6</sub> ]glucose                                      | Sigma-Aldrich                  | Cat#389374                  |
| [ <sup>15</sup> N <sub>5</sub> ]deoxyguanosine                               | Cambridge Isotope Laboratories | Cat# NLM-3899-CA-5          |
| [ <sup>15</sup> N <sub>3</sub> ]deoxycytidine                                | Cambridge Isotope Laboratories | Cat#NLM-3897-25             |
| [ <sup>13</sup> C <sub>9</sub> , <sup>15</sup> N <sub>3</sub> ]deoxycytidine | Cambridge Isotope Laboratories | Cat# 124603802              |
| deoxyguanosine                                                               | MilliporeSigma                 | Cat#D7145                   |
| deoxycytidine                                                                | MilliporeSigma                 | Cat#D3897                   |
| guanosine                                                                    | MilliporeSigma                 | Cat#G6264                   |
| recombinant cytidine deaminase (rCDA)                                        | Abcam                          | Cat#AB99441                 |
| murine MCSF                                                                  | Peprtech                       | Cat#315-02                  |
| murine FLT3L                                                                 | Peprtech                       | Cat#25031L                  |
| human FLT3L                                                                  | Peprtech                       | Cat#300-19                  |
| human IL-7                                                                   | Peprtech                       | Cat#200-07                  |
| L-ascorbic acid 2-phosphate sesquimagnesium salt hydrate                     | MilliporeSigma                 | Cat#A8960                   |
| penicillin/streptomycin                                                      | Gemini Bio-Products            | Cat#400-110                 |

|                                                       |                         |                 |
|-------------------------------------------------------|-------------------------|-----------------|
| PF-06650833                                           | Selleck Chemicals       | Cat#S8531       |
| Takinib                                               | Selleck Chemicals       | Cat#S8663       |
| TPCA-1                                                | Selleck Chemicals       | Cat#S2824       |
| Dipyridamole                                          | MilliporeSigma          | Cat#D9766       |
| NBMPR (S-(4-Nitrobenzyl)-6-thioinosine)               | Cayman Chemical         | Cat#16403       |
| DAPI (4',6-diamidino-2-phenylindole, dihydrochloride) | ThermoFisher Scientific | Cat#D1306       |
| PNA-FITC Conjugate                                    | MilliporeSigma          | Cat#L7381       |
| Dynabeads™ Mouse T-Activator CD3/CD28                 | ThermoFisher Scientific | Cat#11456D      |
| RIPA protein lysis buffer                             | Boston BioProducts      | Cat#BP-115      |
| Halt protease inhibitor cocktail                      | ThermoFisher Scientific | Cat#PI78430     |
| Halt phosphatase inhibitor cocktail                   | ThermoFisher Scientific | Cat#PI78428     |
| Laemmli loading dye                                   | Boston BioProducts      | Cat#BP-110R     |
| 4-12% Bis-tris protein gels                           | ThermoFisher Scientific | Cat#NP0336      |
| Nitrocellulose membrane                               | ThermoFisher Scientific | Cat#88018       |
| Nonfat dry milk                                       | ThermoFisher Scientific | Cat#M-0841      |
| Tris-buffered saline                                  | ThermoFisher Scientific | Cat#50-751-7046 |
| Tween-20                                              | Sigma-Aldrich           | Cat#P9416       |
| Supersignal pico                                      | ThermoFisher Scientific | Cat#34580       |
| Supersignal femto                                     | ThermoFisher Scientific | Cat#34095       |
| Autoradiography film                                  | Denville                | Cat#E3012       |
| DNA degradase PLUS                                    | Zymo                    | Cat#E2021       |
| Hard tissue homogenizing vials                        | Omni International      | Cat#19-628      |
| ACK lysis buffer                                      | ThermoFisher Scientific | Cat#A1049201    |
|                                                       |                         |                 |
| <b>Critical commercial assays</b>                     |                         |                 |
| AnnexinV-FITC apoptosis detection Kit                 | BD Biosciences          | Cat#556547      |
| BCA assay                                             | ThermoFisher Scientific | Cat#23225       |
| Cell Titer Glo                                        | Promega                 | Cat#G9683       |
| NucleoSpin RNA kit                                    | Takara Bio              | Cat#740955.25   |
| MycoPlasma detection Kit                              | Sigma-Aldrich           | Cat#MP0025      |
| EvaGreen qPCR master mix                              | Lambda Biotech          | Cat#MX-S        |
| High-capacity cDNA reverse transcription kit          | ThermoFisher Scientific | Cat#4368814     |



|                                                                                              |                            |                                      |
|----------------------------------------------------------------------------------------------|----------------------------|--------------------------------------|
| Quick RNA miniprep kit                                                                       | Zymo                       | Cat#R1054                            |
| Quick genomic DNA miniprep kit                                                               | Zymo                       | Cat#D3021                            |
| CD43 (Ly-48) MicroBeads, mouse                                                               | Miltenyi                   | Cat#130-049-801                      |
| CD34 MicroBead UltraPure Kit                                                                 | Miltenyi                   | Cat#130-100-453                      |
| Cell Trace Violet (CTV)                                                                      | ThermoFisher Scientific    | Cat#C34557                           |
| <b>Deposited data</b>                                                                        |                            |                                      |
| RNAseq analysis of BMDM response to TLR7 agonists (Figure 7)                                 | NCBI GEO                   | GSE203003                            |
| <b>Experimental models: Cell lines</b>                                                       |                            |                                      |
| Human CCRF-CEM (female) cells                                                                | ATCC                       | Cat#CCL-119;<br>RRID:CVCL_0207       |
| Human JURKAT (male) cells                                                                    | ATCC                       | Cat#TIB-152; RRID:CVCL_0367          |
| Human MOLT4 (male) cells                                                                     | ATCC                       | Cat#CRL-1582;<br>RRID:CVCL_0013      |
| Human NALM6 (male) cells                                                                     | ATCC                       | Cat#CRL-3273;<br>RRID:CVCL_UJ05      |
| Human RS411 (female) cells                                                                   | ATCC                       | Cat#CRL-1873;<br>RRID:CVCL_0093      |
| Human SEM (female) cells                                                                     | DSMZ                       | Cat#ACC-546;<br>RRID:CVCL_0095       |
| Human MV411 (male) cells                                                                     | ATCC                       | Cat#CRL-9591;<br>RRID:CVCL_0064      |
| Human HUT78 (male) cells                                                                     | ATCC                       | Cat# TIB-161;<br>RRID:CVCL_0337      |
| Human SUIT2 (male) cells                                                                     | Accegen                    | Cat#ABC-TC1175;<br>RRID:CVCL_3172    |
| Human HCC827 (female) cells                                                                  | ATCC                       | Cat#CRL-2868;<br>RRID:CVCL_2063      |
| Human M297 cells                                                                             | This paper                 | N/A                                  |
| Human M230 cells                                                                             | This paper                 | N/A                                  |
| Human M257 cells                                                                             | This paper                 | N/A                                  |
| Human M296 cells                                                                             | This paper                 | N/A                                  |
| Human M418 cells                                                                             | This paper                 | N/A                                  |
| MS5-hDLL1 (male) cells                                                                       | MilliporeSigma             | Cat#SCC167;<br>RRID:CVCL_VR88        |
| HS5 (male) cells                                                                             | ATCC                       | Cat#CRL-11882;<br>RRID:CVCL_3720     |
| FT293 cells                                                                                  | ThermoFisher Scientific    | Cat#R70007; RRID:CVCL_6911           |
| <b>Experimental models: Organisms/strains</b>                                                |                            |                                      |
| Mouse: NOD- <i>Prkdc</i> <sup>em26Cd52</sup> //2 <i>rg</i> <sup>em26Cd22</sup> /NjuCrl (NCG) | Charles River Laboratories | Cat#572; RRID:IMSR_CRL:572           |
| Mouse: NOD.Cg- <i>Prkdc</i> <sup>scid</sup> //2 <i>rg</i> <sup>tm1Wjl</sup> /SzJ (NSG)       | Jackson Laboratories       | Cat# 005557;<br>RRID:IMSR_JAX:005557 |
| Mouse: C57BL/6J (C57BL/6)                                                                    | Jackson Laboratories       | Cat#000664;<br>RRID:IMSR_JAX:000664  |
| Mouse: BALB/cJ (BALBc)                                                                       | Jackson Laboratories       | Cat#000651;<br>RRID:IMSR_JAX:000651  |

|                                                                                                                     |                         |                                                                                                                       |
|---------------------------------------------------------------------------------------------------------------------|-------------------------|-----------------------------------------------------------------------------------------------------------------------|
| Mouse: NOD/ShiLtJ (NOD)                                                                                             | Jackson Laboratories    | Cat#001976;<br>RRID:IMSR_JAX:001976                                                                                   |
| Mouse: B6.129S- <i>Rag2</i> <sup>tm1Fwa</sup> <i>Cd47</i> <sup>tm1Fpl</sup> <i>Ii2rg</i> <sup>tm1Wjl</sup> /J (TKO) | Jackson Laboratories    | Cat#025730;<br>RRID:IMSR_JAX:025730                                                                                   |
| Mouse: B6.129S1- <i>Tlr7</i> <sup>tm1Flv</sup> /J (TLR7 KO)                                                         | Jackson Laboratories    | Cat# 008380;<br>RRID:IMSR_JAX:008380                                                                                  |
| Mouse: B6.129P2(SJL)- <i>Myd88</i> <sup>tm1.1Defr</sup> /J (MYD88 KO)                                               | Jackson Laboratories    | Cat# 009088;<br>RRID:IMSR_JAX:009088                                                                                  |
| <b>Oligonucleotides</b>                                                                                             |                         |                                                                                                                       |
| polyU 21-mer<br>(5'-rUrUrUrUrUrUrUrUrUrUrUrUrUrUrUrUrUrUrUrU-3')                                                    | IDT                     | N/A                                                                                                                   |
| mouse Il6 RT-PCR primer-forward<br>(5'-CTGCAAGAGACTTCCATCCAG-3')                                                    | This paper              | N/A                                                                                                                   |
| mouse Il6 RT-PCR primer-reverse<br>(5'-AGTGGTATAGACAGGTCTGTT-3')                                                    | This paper              | N/A                                                                                                                   |
| mouse Il10 RT-PCR primer-forward<br>(5'-GGTTGCCAAGCCTTATCGGA-3')                                                    | This paper              | N/A                                                                                                                   |
| mouse Il10 RT-PCR primer-reverse<br>(5'-ACCTGCTCCACTGCCTTGCT-3')                                                    | This paper              | N/A                                                                                                                   |
| mouse Ifnb1 RT-PCR primer-forward<br>(5'-CAGCTCCAAGAAAGGACGAAC-3')                                                  | This paper              | N/A                                                                                                                   |
| mouse Ifnb1 RT-PCR primer-reverse<br>(5'-GGGAGTGTA ACTCTTCTGCAT-3')                                                 | This paper              | N/A                                                                                                                   |
| mouse Actin RT-PCR primer-forward<br>(5'-GTATCCTGACCCTGAAGTACC-3')                                                  | This paper              | N/A                                                                                                                   |
| mouse Actin RT-PCR primer-reverse<br>(5'-TGAAGGTCTCAAACATGATCT-3')                                                  | This paper              | N/A                                                                                                                   |
| human SAMHD1-targeting gRNA<br>(5-GTCATCGCAACGGGGACGCT-3')                                                          | Liang et al.<br>2021.   | N/A                                                                                                                   |
| Human SAMHD1 ORF                                                                                                    | NCBI                    | NM_015474.3                                                                                                           |
| Human CDA ORF                                                                                                       | NCBI                    | NM_001785.2                                                                                                           |
| <b>Recombinant DNA</b>                                                                                              |                         |                                                                                                                       |
| pMD2G lentiviral packaging plasmid                                                                                  | Addgene                 | Cat#12259                                                                                                             |
| psPAX2 lentiviral packaging plasmid                                                                                 | Addgene                 | Cat#12260                                                                                                             |
| LentiCrisprV2 plasmid                                                                                               | Addgene                 | Cat#52961                                                                                                             |
| pLenti PURO DEST mammalian expression plasmid                                                                       | Addgene                 | Cat#17452                                                                                                             |
| pENTR-D/TOPO plasmid                                                                                                | ThermoFisher Scientific | Cat#KP240020                                                                                                          |
| pLenti6/BLOCK-iT™-DEST U6 Gateway® entry vector                                                                     | ThermoFisher Scientific | Cat#K494300                                                                                                           |
| <b>Software and algorithms</b>                                                                                      |                         |                                                                                                                       |
| Flowjo software                                                                                                     | Tree Star               | <a href="https://www.flowjo.com">https://www.flowjo.com</a>                                                           |
| Graphpad Prism software                                                                                             | Graphpad                | <a href="https://www.graphpad.com/scientific-software/prism/">https://www.graphpad.com/scientific-software/prism/</a> |
| OsiriX                                                                                                              | Pixmeo                  | <a href="https://www.osirix-viewer.com/about/company/">https://www.osirix-viewer.com/about/company/</a>               |
| <b>Other</b>                                                                                                        |                         |                                                                                                                       |
| 6460 triple quadrupole mass spectrometer                                                                            | Agilent                 | N/A                                                                                                                   |

|                                     |                         |     |
|-------------------------------------|-------------------------|-----|
| SynergyH1 microplate reader         | BioTek                  | N/A |
| QuantStudio3 Real-Time PCR system   | ThermoFisher Scientific | N/A |
| G8 microPET/CT scanner              | PerkinElmer             | N/A |
| Vevo 2100 ultrasound imaging system | VisualSonics            | N/A |
